# Supplementary material for: Ethylene glycol oligomer modified-sodium alginate for efficiently improving the drug loading and the tumor therapeutic effect
Source: Royal Society of Chemistry journal article supplement (doi:10.1039/c3tb20968g), 2013-01-01
Supplement: c3tb20968g.pdf [file c3tb20968g.pdf]

## **Ethylene glycol oligomer modified-sodium alginate for efficiently improving the drug loading and the tumor therapeutic effect**

Hua Guo, Chengling Yang, Zhengpeng Hu, Wei Wang, Yukun Wu, Quanyong Lai and Zhi Yuan\*

*Key Laboratory of Functional Polymer Materials, Ministry of Education, Institute of Polymer Chemistry, Nankai University, Tianjin 300071, China*

\* Corresponding author.

Tel.: +86 22 23501164; fax: +86 22 23503510.

E-mail address: [zhiy@nankai.edu](mailto:zhiy@nankai.edu)

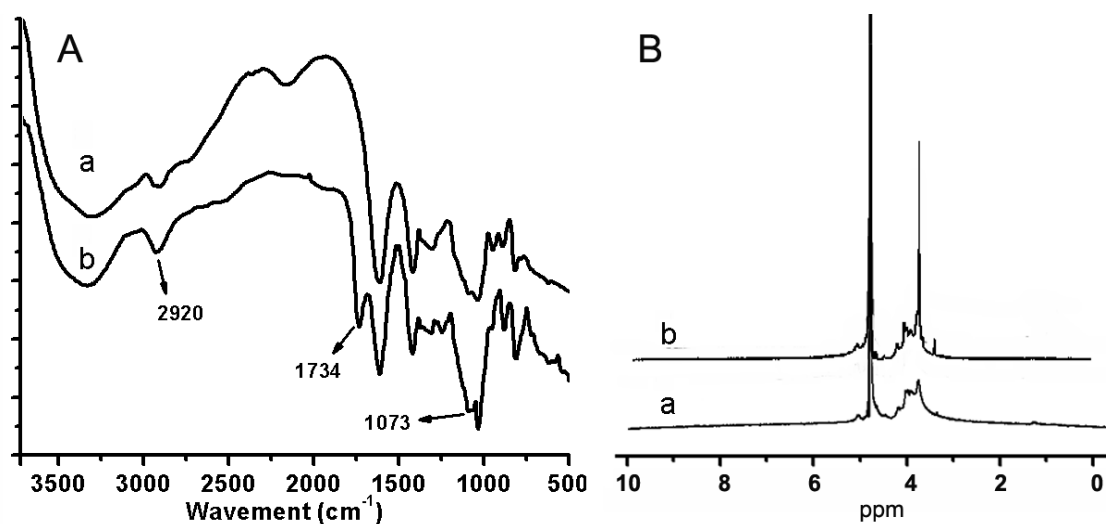

**Fig. S1** FT-IR (A) and <sup>1</sup>H NMR (B) spectra of ALG (a) and ALG-mOEG (b)

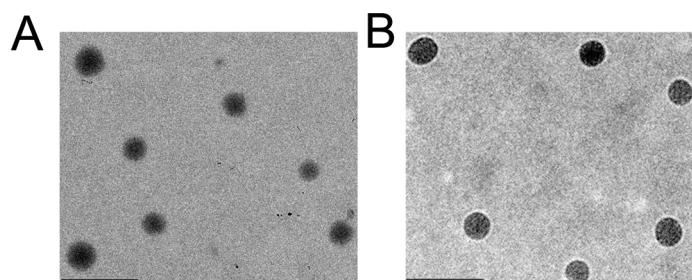

**Fig. S2** the TEM image of (A) DOX-ALG-mOEG NPs and (B) DOX-ALG NPs; All scale bars are 200 nm.

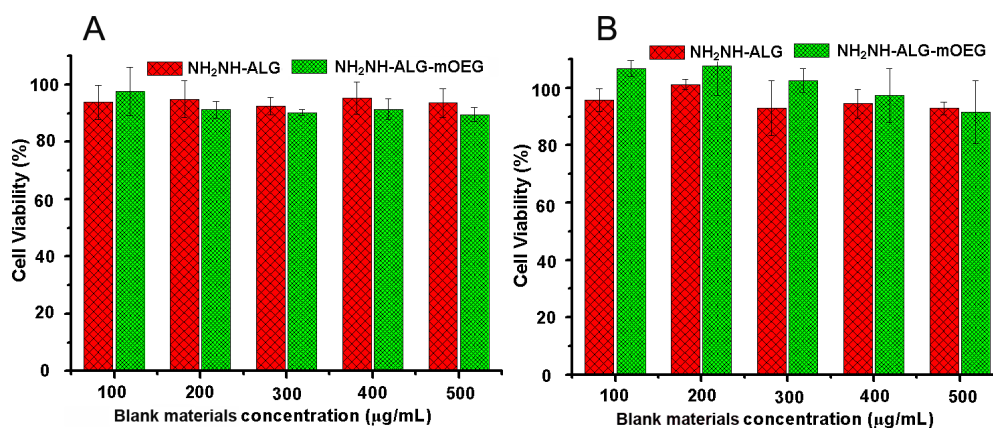

**Fig. S3** Cytotoxicity of the NH<sub>2</sub>NH-ALG and NH<sub>2</sub>NH-ALG-mOEG against HepG2 cells (A) and Chang liver cells (B) after incubation for 48 h
